# Supplementary material for: Deciphering the mechanisms of selective inhibition for the tandem BD1/BD2 in the BET-bromodomain family
Source: Royal Society of Chemistry journal article supplement (doi:10.1039/c7cp04608a), 2017-01-01
Supplement: c7cp04608a1.pdf [file c7cp04608a1.pdf]

## **Supporting Information**

### **Deciphering the Mechanisms of the Selective Inhibition for the tandem BD1/BD2 in BET-Bromodomains family**

Chunyan Cheng, Hongjuan Diao, Fan Zhang, Yongheng Wang, Kai Wang\* and Ruibo Wu\*

School of Pharmaceutical Sciences, Sun Yat-sen University, Guangzhou 510006, P. R.  
China

\*Email: wangk97@mail.sysu.edu.cn; wurb3@mail.sysu.edu.cn

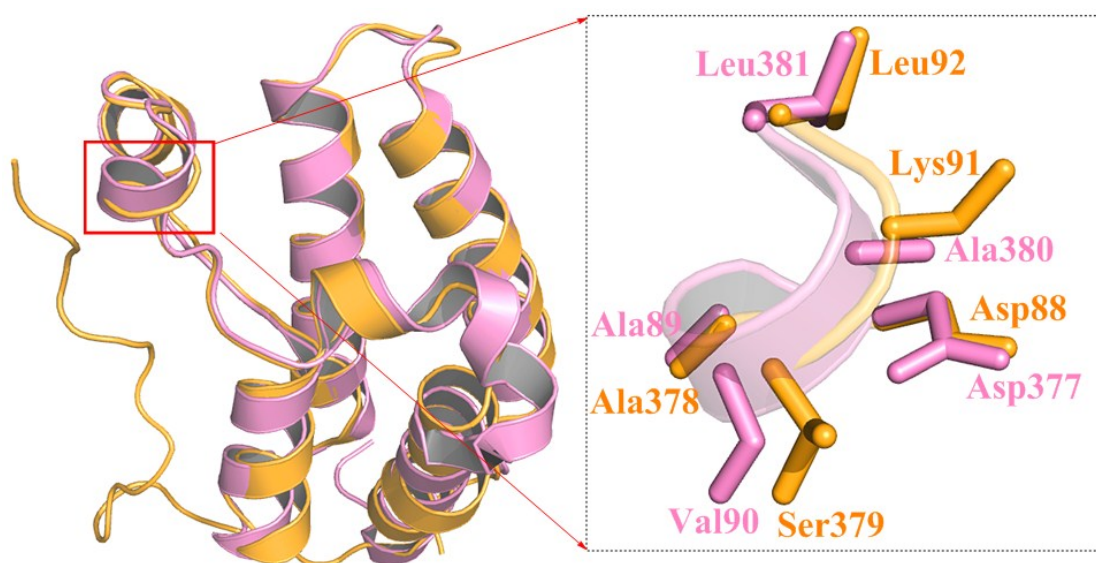

**Fig. S1** Crystal structure alignment of BRD4-BD1 and BRD2-BD2. The key part of the ZA-loop is highlighted (right). Residues in BD1 are highlighted in bright-orange and in BD2 are marked in pink.

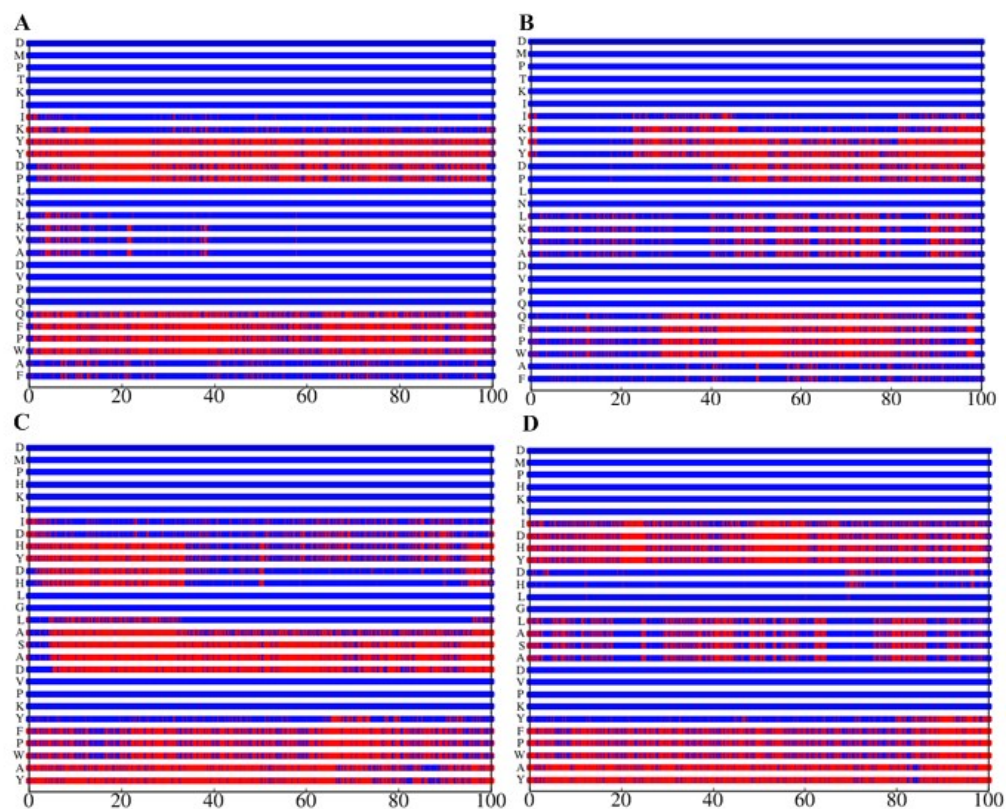

**Fig. S2** The secondary structure evolutions of the whole ZA-loop. Helix is marked in red and loop in blue. (A) For apo-BRD4-BD1 simulation system. (B) For RVX-208 bounded BRD4-BD1 complex. (C) For apo-BRD2-BD2 simulation system. (D) For RVX-208 bounded BRD2-BD2 complex.

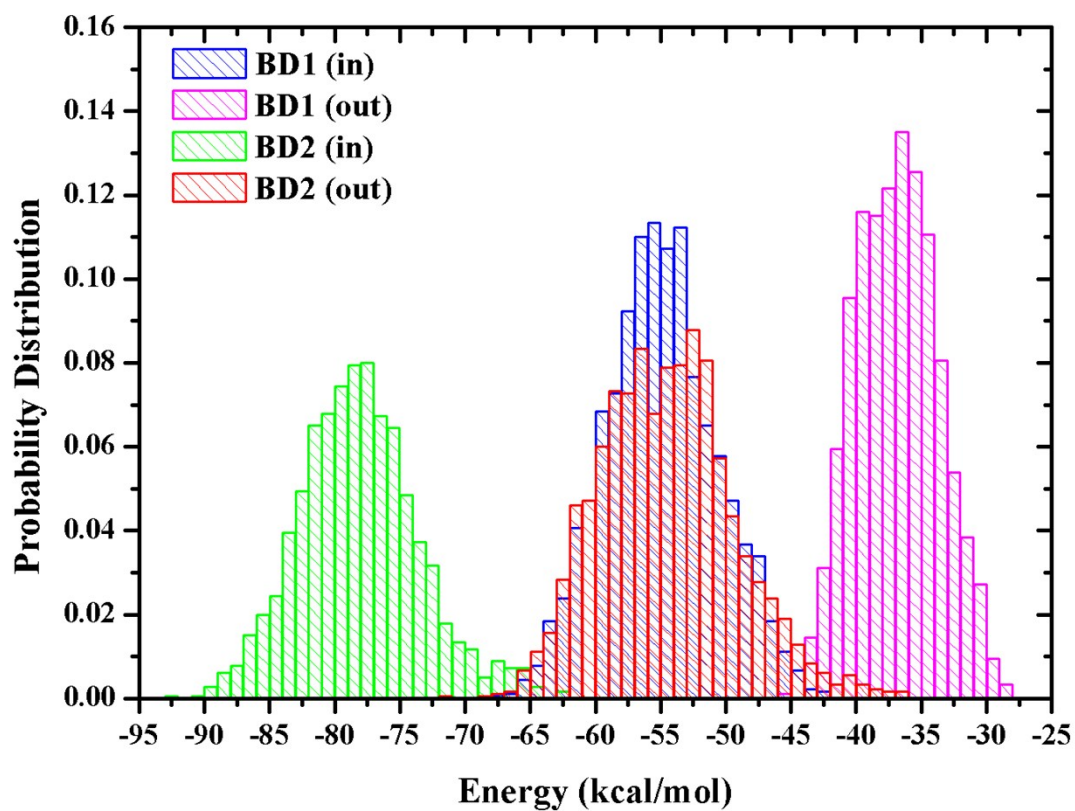

**Fig. S3** The calculated Electrostatics and Van der Waals interaction energies between the QM subsystem (i.e., RVX-208) and its protein environment.

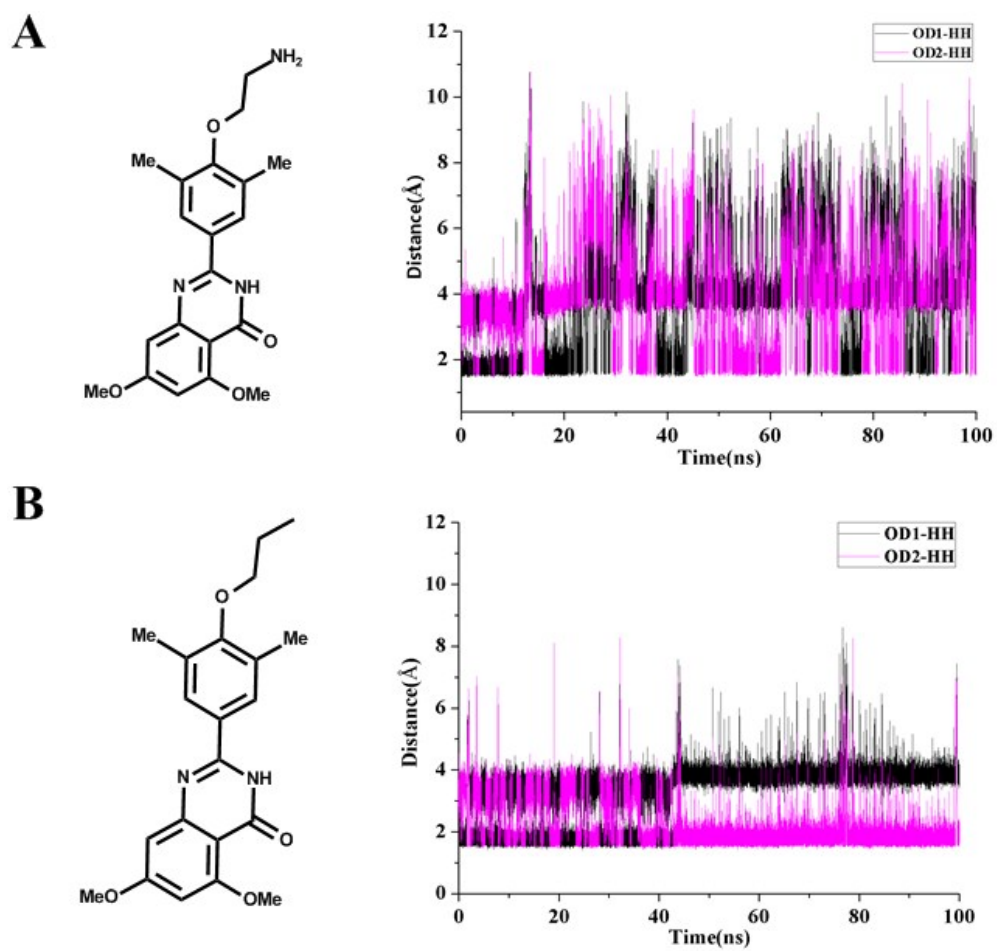

**Fig. S4** The two designed small molecules and the internal H-bond distance change along the MD trajectory in BRD4-BD1.

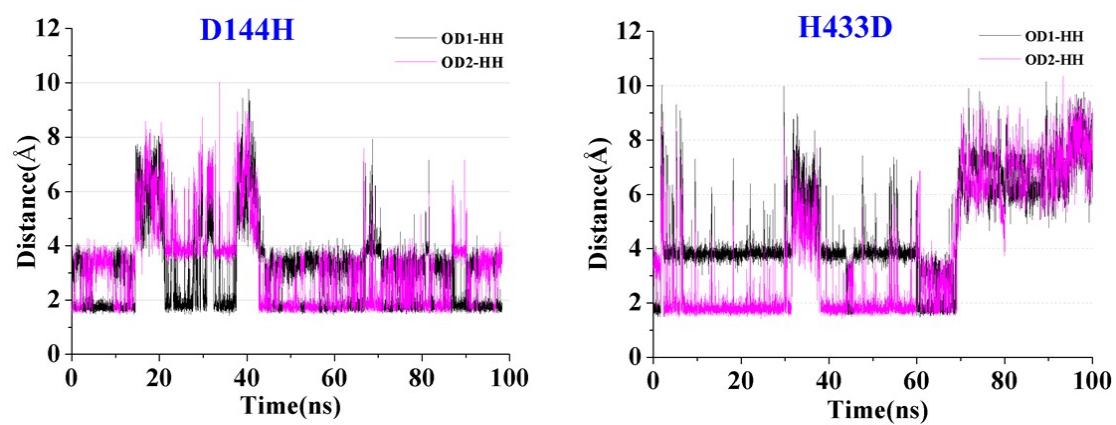

**Fig. S5** The internal H-bond variation in D144H BD1 and H433D BD2 models.

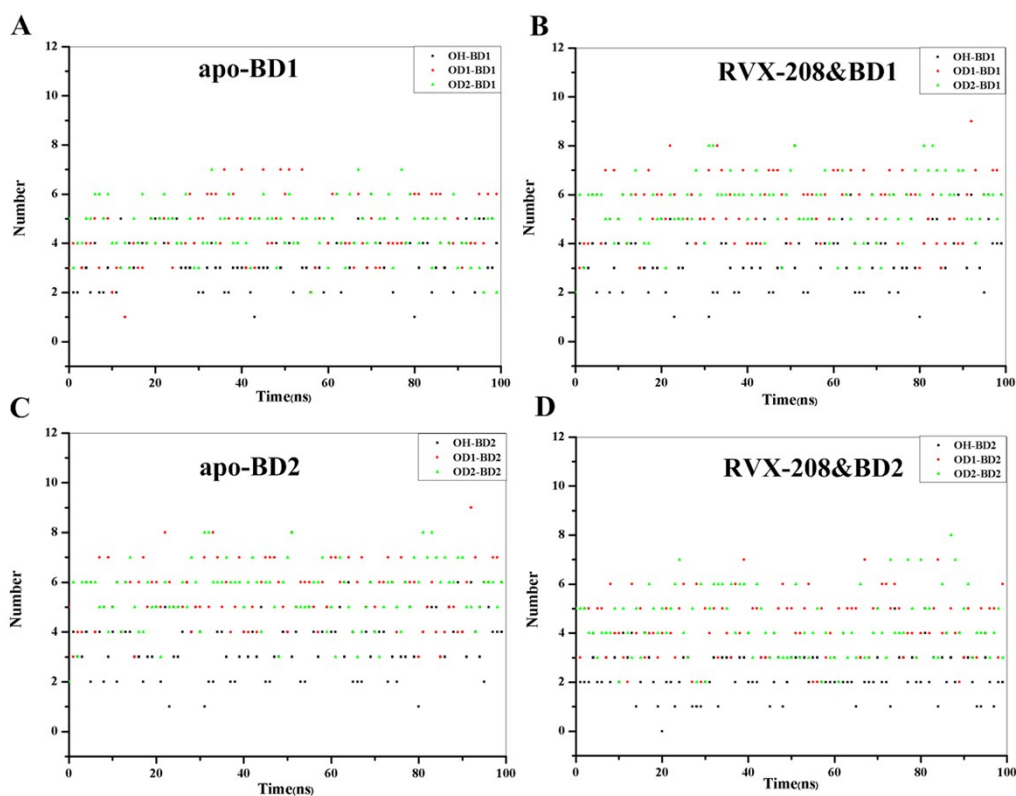

**Fig. S6** The number of water molecules around 3.5 Å from the selected atoms of Asp96 and Tyr139 in apo-/holo- BD1/BD2. The OH refers to the hydroxyl oxygen of Tyr139. The OD1 and OD2 refer to the two carboxyl oxygens of Asp96, respectively. As shown in Figures, no matter in apo- or holo- BD1/BD2, there are about 4~5 water molecules around the conserved D-Y dyad (Asp96 and Tyr139) in most case. It indicates that the existence of the solvent water would not destroy the intrinsic D-Y hydrogen bond.

**Table S1** Energy contribution analysis (kcal/mol) of the key residues in RVX-208 bounded BRD4-BD1/BRD2-BD2 complexes via QM/MM calculation. The energy contribution of each residue included the Van der Waals and electrostatic interaction. The residues with the notable contribution on stabilization energy were marked in bold.

| Models |     | Key Residues |              |              |              |               |              |               |              |
|--------|-----|--------------|--------------|--------------|--------------|---------------|--------------|---------------|--------------|
|        |     | P82/371      | L92/381      | L94/383      | Y97/386      | C136/425      | Y139/428     | D144/H433     | I146/V435    |
| BD1    | In  | <b>-5.72</b> | <b>-4.93</b> | -1.31        | -1.80        | <b>-10.94</b> | <b>-8.00</b> | 2.23          | <b>-5.93</b> |
|        | Out | <b>-4.57</b> | -1.42        | <b>-2.40</b> | -2.19        | <b>-7.41</b>  | <b>-3.68</b> | 0.79          | <b>-4.00</b> |
| BD2    | In  | <b>-8.62</b> | -2.27        | -5.62        | -4.79        | <b>-13.18</b> | <b>-5.91</b> | <b>-14.16</b> | <b>-8.05</b> |
|        | Out | -3.24        | -0.96        | -1.77        | <b>-4.00</b> | <b>-8.24</b>  | <b>-6.51</b> | <b>-10.60</b> | <b>-4.51</b> |

**Table S2** The calculated binding free energies of RVX-208 in wild and mutant models from MMPB/GBSA calculations.

| Free energy analysis ( kcal/mol) for binding of compound RVX-208 |                         |                         |                         |              |                                        |                                        |
|------------------------------------------------------------------|-------------------------|-------------------------|-------------------------|--------------|----------------------------------------|----------------------------------------|
| Models                                                           | $\Delta E_{\text{ele}}$ | $\Delta E_{\text{vdw}}$ | $\Delta G_{\text{sol}}$ | $-T\Delta S$ | $\Delta G_{\text{binding}}(\text{PB})$ | $\Delta G_{\text{binding}}(\text{GB})$ |
| BRD2-BD2<br>with RVX-<br>208                                     | -6.07                   | -41.32                  | 9.42                    | -18.29       | -15.4 $\pm$ 3.32                       | -19.68 $\pm$ 2.66                      |
| H433D                                                            | -9.66                   | -33.64                  | 14.29                   | -17.35       | -7.88 $\pm$ 3.30                       | -11.66 $\pm$ 2.79                      |
| BRD4-BD1<br>with RVX-<br>208                                     | -30.51                  | -42.68                  | 39.35                   | 17.94        | -8.38 $\pm$ 3.40                       | -15.90 $\pm$ 2.50                      |
| D144H                                                            | 3.63                    | -46.18                  | 5.93                    | -18.21       | -15.27 $\pm$ 4.56                      | -18.42 $\pm$ 4.99                      |
